# Supplementary material for: Diagnostic Performance of Intravascular Ultrasound-Derived Minimal Lumen Area to Predict Functionally Significant Non-Left Main Coronary Artery Disease: a Meta-Analysis
Source: PubMed Central journal article supplement — Korean Circ J. 2016 Sep 28;46(5):622–31. doi: 10.4070/kcj.2016.46.5.622 (PMC5054173; doi:10.4070/kcj.2016.46.5.622), 2016-09-28
Supplement: kcj-46-622-s001.pdf [file kcj-46-622-s001.pdf]

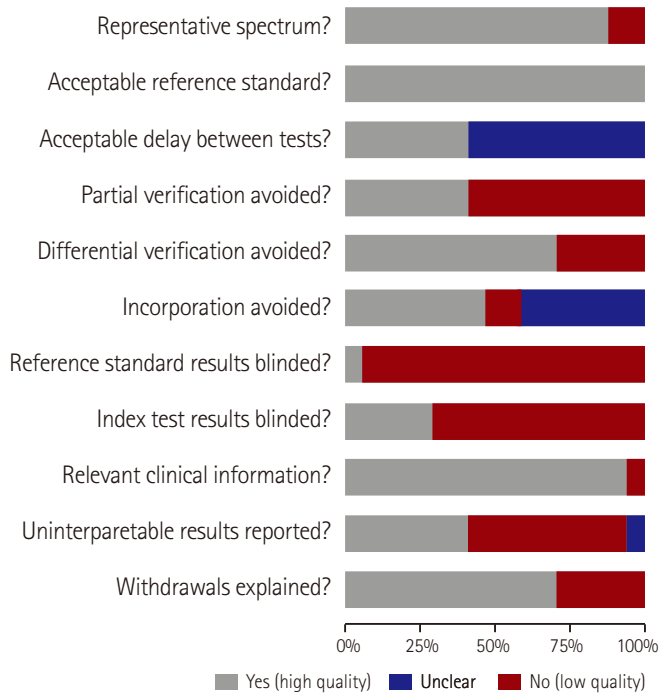

**Supplementary Fig. 1.** Overall quality rating according to the QUADAS list. QUADAS: quality assessment for studies of diagnostic accuracy.
